# Supplementary material for: Biological and dust aerosol as sources of ice nucleating particles in the Eastern Mediterranean: source apportionment, atmospheric processing and parameterization
Source: Copernicus journal article supplement (doi:10.5194/egusphere-2024-511), 2024-02-27
Supplement: Supplementary file [file egusphere-2024-511-AC2-supplement.pdf]

## Response to EGUSPHERE-2024-511 reviews for RC2

We thank Reviewer #2 for their effort and feedback on our manuscript EGUSPHERE-2024-511. In response to the suggestions and questions, please find our answers and corrections listed below: **Reviewer #2 comments are extracted in bold from original review supplement**; our responses are given directly below in normal font; *the original text in previous manuscript is repeated in red italic* and *revised text is typed in blue italic*.

### General comments:

**This study provides a comprehensive analysis of the sources of Ice Nucleating Particles (INPs) for mixed-phase clouds at Mount Helmos in the Eastern Mediterranean. By integrating in-situ observations, remote sensing data, and modeling experiments, the study examines the influence of boundary layer turbulence, vertical aerosol distributions, and meteorological conditions. It distinguishes among contrasting meteorological situations where aerosol properties and associated INP activities and levels differ. Additionally, the study evaluates existing INP schemes in the literature and proposes new INP parameterizations, constrained by the observations, that outperform previous ones for this specific location.**

**This is an excellently written and highly relevant study. The extensive experimental data is thoroughly analyzed, and many of the findings are novel. The association between different aerosol properties and INPs is robust, and the inclusion of such dependencies in INP schemes is promising.**

**I have no major concerns about this paper. One possible consideration is its length—39 pages with a supplementary section containing 35 figures. While the paper is comprehensive and detailed, it might have been more digestible as a two-part paper: one focusing on the thorough analyses and the other on the development and evaluation of the INP schemes.**

We appreciate these positive comments! We did consider separating this manuscript into two parts, but preferred the current organization, to have everything in one place.

### Specific comments

- 1. The underestimation of INP concentrations by the INSEKT compared to the PINE is a weakness of the methodology. There is a specific analysis of the differences between the INSEKT and the PINE in the supplemental material and a final discussion in the conclusions. However, it is important to discuss more broadly the implications of such potential systematic error in the evaluation of the INP schemes and the development of new schemes. Providing an estimate of the effect of this underestimation on the evaluation of INP schemes would be helpful. To what extent is this affecting the evaluation of schemes in the literature? How were INPs measured in other studies? This is particularly important when comparing with other studies and for future evaluation of the new schemes proposed with INP data obtained with other methods, as well as when using the new schemes in models.**

We agree. To address the above concerns, we have added the following sentences to the revised Summary and Conclusion part: *“We note that underestimated INPs caused by insufficient sampling of aerosol particles for offline INP analysis may also result in lower estimation of aerosol-cloud interactions for warm temperatures in the MPC regime (e.g.,  $>-15^{\circ}\text{C}$ ) which could carry important implications for inducing biases in the microphysical evolution of clouds in models. Therefore, the particle collection efficiency should be evaluated for existing INP data and INP parameterizations in the literature before using for climate models. Filter sampling (Conen et al., 2015; Schneider et al., 2021) and liquid impinger (Wieder et al., 2022) are commonly used in existing studies to collect INP samples for offline analysis. Standard sampling protocols for both methods are required to ensure sampling efficiency inter-comparison.”*

- 2. Figure 5: Understanding the differences on the proportions of the WIBS channels between the aerosol sources from this Figure is challenging. I suggest that you use box plots as in Figure 3. This would provide a better quantitative comparison of the proportions among sources.**

Thanks for the suggestion. It is not a single type of fluorescent particle that makes an identified aerosol source distinct from the others. Instead, the distinctions of fluorescent properties of an aerosol source are shown by the portioning of different types of fluorescent particles. Therefore, we present the fraction pattern of different types of WIBS fluorescent

particles in Fig. 5 but do not directly show the exact values of the properties like in Fig.3. Nevertheless, we now provide box plots (Fig. R1) for different types of WIBS fluorescent particles for all identified aerosol sources (shown below). For example, three aerosol sources influenced by Saharan dust show comparable amount of  $B_{\text{WIBS}}$  particles (Fig. R1b), however, the median number concentration of  $B_{\text{WIBS}}$  particles of those three sources varies by approximately one order of magnitude (Fig. R1c). Thus, the fraction patterns presented in Fig. 5 in the original manuscript is more informative than box plots in Fig. R1.

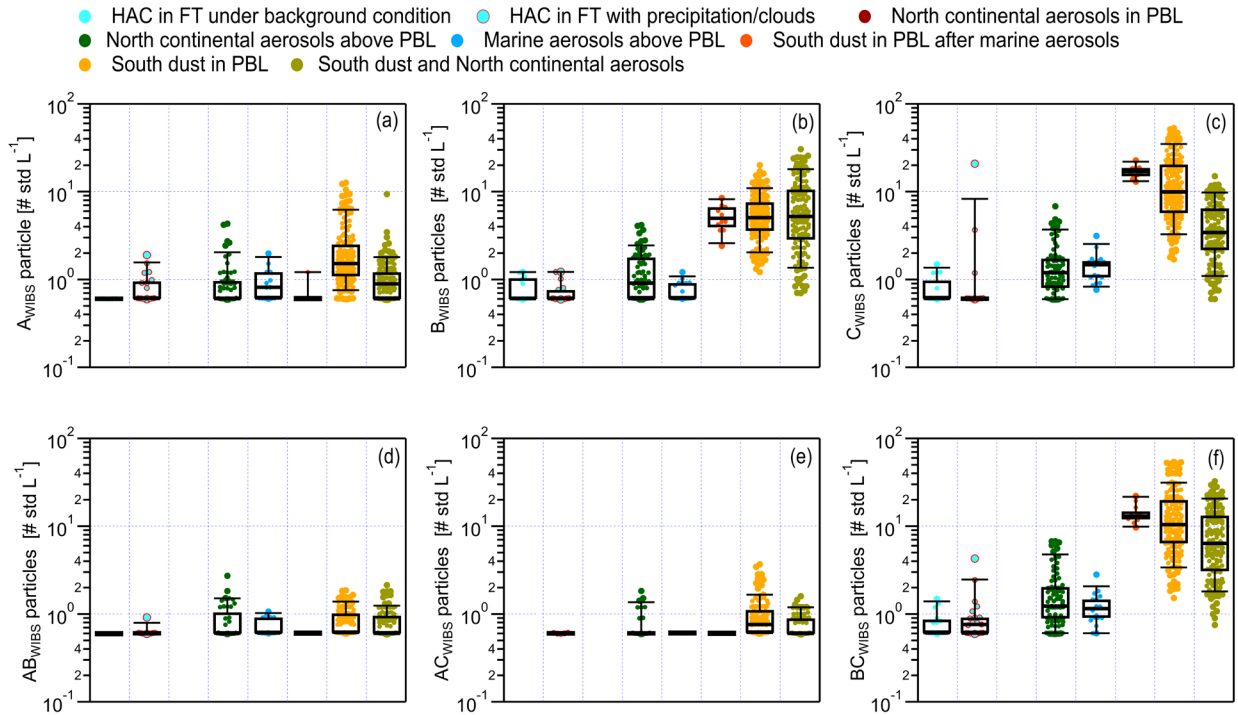

**Figure R1.** Box plots for different types of WIBS fluorescent particles for all identified aerosol sources. (a)  $A_{\text{WIBS}}$ . (b)  $B_{\text{WIBS}}$ . (c)  $C_{\text{WIBS}}$ . (d)  $AB_{\text{WIBS}}$ . (e)  $AC_{\text{WIBS}}$ . (f)  $BC_{\text{WIBS}}$ . The box shows the median line and the range between 25<sup>th</sup> and 75<sup>th</sup> quartiles. The lower and upper caps of the box indicate the 9<sup>th</sup> and 91<sup>th</sup> percentiles, respectively. Note that there is no WIBS data available for the source of North continental aerosols in PBL.

**3. Section 3.4.1 and Figure 13. I do not fully understand the rationale of comparing existing INP schemes beyond their species-range of applicability. For instance, Niemand and Ulrich focus on dust, McCluskey on marine organics and Tobo on biological particles mostly. While in the supplemental material additional figures are provided for each of the sources and INP schemes, I believe that Figure 13 in the main paper would be more informative if the color coding would refer to the INP source in the observations. Also, please discuss in this section how the uncertainty related to the use of the INSEKT may affect this evaluation.**

This is a good question. We use existing INP parameterizations (Niemand et al., 2012; Tobo et al., 2013; Ullrich et al., 2017; McCluskey et al., 2018) to test their capability to predict INPs observed at  $(\text{HAC})^2$  and understand prediction biases for the different particle types seen at  $(\text{HAC})^2$ . This is useful to examine the generality and limitations of each parameterization – the insights of which were then used to develop the new formulation presented in our manuscript.

We considered using different colors to indicate different INP sources for the results of each INP parameterization (scheme) in Fig. 13. However, this is not ideal if we are also using the color to scale the ice nucleation temperature. Thus, we provide supplemental figures presenting the results of different INP sources for each INP parameterization.

Now, a new sentence as below is added in the revised manuscript to address the influence of INSEKT sampling on the INP parameterization results: “*The overall consistent trend between INSEKT and PINE data clusters in Fig. 13 and*

*Fig. 14 for all INP parameterizations suggests that filtered INSEKT dataset does not show discrepancy compared to PINE dataset and not influence the INP parameterization development.”*

- 4. Section 3.4.2 and Table 3: An explanation about the selected specific forms for each equation is needed. Also please describe how they were fitted to the measurements. This could be provided in the supplemental material. Also please revise the formulations and check for any potential typo. Given the number of parameters, it would be very unfortunate that potential typos are propagated into future modeling studies.**

We agree. We now add new statements in Section 3.4.2 to explain the differences between our new INP parameterizations and those provided in the literature, as detailed below:

*“We also adapt Tobo2013FBAP with new parameters and it will be compared to a new parameterization we develop, termed “Helmos Fluo<sub>WIBS</sub>” that predicts INP as a function of Fluo<sub>WIBS</sub>, WIBS<sub>ratio</sub> (Fluo<sub>WIBS</sub> to NonFluo<sub>WIBS</sub>) and T. Compared to Tobo2013FBAP, the new factor “(WIBS<sub>ratio</sub>)<sup>(e<sup>T</sup>+f)</sup>” in “Helmos Fluo<sub>WIBS</sub>” is used to capture the contribution of fluorescent particles to the observed INPs at different temperatures.”*

*“Given that Fluo<sub>WIBS</sub> may not include all potential INPs (especially for T < -20 °C where nonbiological particles dominate), we propose two parameterizations (“Helmos Total<sub>WIBS\_1</sub>” and “Helmos Total<sub>WIBS\_2</sub>”) using Total<sub>WIBS</sub> to represent aerosol particles that may serve sources for INPs. Both parameterizations depend on Total<sub>WIBS</sub>, WIBS<sub>ratio</sub> and T but with different formula forms. Compared to DeMott2015 and DeMott2010, “Helmos Total<sub>WIBS\_1</sub>” and “Helmos Total<sub>WIBS\_2</sub>” also consider the effect of fluorescent particle portioning in different INP sources by using the corresponding factor including “WIBS<sub>ratio</sub>”.”*

*“... two parameterizations (“Helmos Total<sub>SMPS+APS\_1</sub>” and “Helmos Total<sub>SMPS+APS\_2</sub>”) using a similar formula to that of DeMott2015 and DeMott2010 respectively) are proposed to calculate N<sub>INP</sub> based on Total<sub>SMPS+APS</sub> and T.”*

Also, a paragraph as below is now added in the supplementary Section S9 to describe how the parameters in each INP parameterizations are calculated by fitting the observed dataset to the formula.

*“Nonlinear regression with robust fitting option was used to calculate parameters for each proposed parameterization. Bisquare robust fitting was used for the regression model function to minimize a weighted sum of squares (to minimize the effect of outliers – and advantage over the least-squares approach). Weighted least square options were also suggested in the recent literature for INP parameterizations (Li et al., 2022). Also, fitted parameters were calculated with the error term normally distributed with mean 0 and standard deviation ≤0.1.”*

We thoroughly checked the parameters in Table 3 - thank you for the suggestion!

- 5. Line 463: change to “This means anthropogenic pollution may impact (HAC)<sup>2</sup> even when it is in the FT”**

Indeed so! The sentence now reads: *“This means anthropogenic pollution may impact (HAC)<sup>2</sup> even when it is in the FT.”*

- 6. Figure 9. Typo in the x axis of 9a (23.9 instead of 2.39)**

Good point! Reviewer #1 also raised this point (minor comment #7), and changes were made.

- 7. Line 785: revise this sentence. It is not clear.**

Good point. The sentence now reads as: *“In addition, we note that INSEKT INPs evaluated as lower estimations beyond a factor of 5 by comparing to PINE INPs (see Supplement S3) are excluded from the parameterization dataset.”*

- 8. Conclusions: how the developed parameterizations could be applied in current climate models? Some models already include dependencies on dust, marine organics and PBAPs. A detailed**

**perspective/recommendation in this sense would be extremely useful for modelers and make even more applicable the results of this paper.**

The relevant statements are revised, as follows:

*“Existing INP parameterizations in the literature may be improved by including the ratio of fluorescent-to-nonfluorescent or coarse-to-fine particles if available. Firstly, regional models, like mesoscale Weather Research and Forecasting (WRF) model, can use the improved INP parameterizations to calculate the ice formation processes for MPCs which ultimately helps to predict the local weather condition changes, such as storm formation and evolution (Georgakaki et al., 2024). Moreover, published dataset from existing field studies can be reorganized to a large and inclusive data base for the development of more general INP parameterizations for MPCs in global scales. In doing so, the predictability and applicability of the developed INP parameterizations for climate models can be improved. In particular, MPC simulations for regions with different INP sources, such as a cross-road of different air masses like (HAC)<sup>2</sup>, or for different regions with different prevailing INP sources, such as continental or marine regions, can be better achieved. Ultimately, the regional and global simulations of aerosol-cloud interactions, as well as climate modelling, can be benefited from the improved INP parameterization by using its own dataset.”*

## References:

- Conen, F., Rodríguez, S., Glin, C. H., Henne, S., Herrmann, E., Bukowiecki, N., and Alewell, C.: Atmospheric ice nuclei at the high-altitude observatory Jungfraujoch, Switzerland, *Tellus B Chem. Phys. Meteorol.*, 67, <https://doi.org/10.3402/tellusb.v67.25014>, 2015.
- Li, G., Wieder, J., Pasquier, J. T., Henneberger, J., and Kanji, Z. A.: Predicting atmospheric background number concentration of ice nucleating particles in the Arctic, *Atmospheric Chemistry and Physics Discussions*, <https://doi.org/10.5194/acp-2022-21>, 2022.
- McCluskey, C. S., Ovadnevaite, J., Rinaldi, M., Atkinson, J., Belosi, F., Ceburnis, D., Marullo, S., Hill, T. C. J., Lohmann, U., Kanji, Z. A., O'Dowd, C., Kreidenweis, S. M., and DeMott, P. J.: Marine and Terrestrial Organic Ice-Nucleating Particles in Pristine Marine to Continentally Influenced Northeast Atlantic Air Masses, *J. Geophys. Res. Atmos.*, 123, 6196-6212, <https://doi.org/10.1029/2017jd028033>, 2018.
- Niemand, M., Möhler, O., Vogel, B., Vogel, H., Hoose, C., Connolly, P., Klein, H., Bingemer, H., DeMott, P., Skrotzki, J., and Leisner, T.: A Particle-Surface-Area-Based Parameterization of Immersion Freezing on Desert Dust Particles, *J. Atmos. Sci.*, 69, 3077-3092, <https://doi.org/10.1175/jas-d-11-0249.1>, 2012.
- Schneider, J., Höhler, K., Heikkilä, P., Keskinen, J., Bertozzi, B., Bogert, P., Schorr, T., Umo, N. S., Vogel, F., Brasseur, Z., Wu, Y., Hakala, S., Duplissy, J., Moiseev, D., Kulmala, M., Adams, M. P., Murray, B. J., Korhonen, K., Hao, L., Thomson, E. S., Castarède, D., Leisner, T., Petäjä, T., and Möhler, O.: The seasonal cycle of ice-nucleating particles linked to the abundance of biogenic aerosol in boreal forests, *Atmos. Chem. Phys.*, 21, 3899-3918, <https://doi.org/10.5194/acp-21-3899-2021>, 2021.
- Tobo, Y., Prenni, A. J., DeMott, P. J., Huffman, J. A., McCluskey, C. S., Tian, G., Pöhlker, C., Pöschl, U., and Kreidenweis, S. M.: Biological aerosol particles as a key determinant of ice nuclei populations in a forest ecosystem, *J. Geophys. Res. Atmos.*, 118, 10,100-110,110, <https://doi.org/10.1002/jgrd.50801>, 2013.
- Ullrich, R., Hoose, C., Möhler, O., Niemand, M., Wagner, R., Höhler, K., Hiranuma, N., Saathoff, H., and Leisner, T.: A New Ice Nucleation Active Site Parameterization for Desert Dust and Soot, *J. Atmos. Sci.*, 74, 699-717, <https://doi.org/10.1175/jas-d-16-0074.1>, 2017.
- Wieder, J., Mignani, C., Schär, M., Roth, L., Sprenger, M., Henneberger, J., Lohmann, U., Brunner, C., and Kanji, Z. A.: Unveiling atmospheric transport and mixing mechanisms of ice-nucleating particles over the Alps, *Atmos. Chem. Phys.*, 22, 3111-3130, <https://doi.org/10.5194/acp-22-3111-2022>, 2022.
